# Supplementary material for: Self-decarboxylation of trichloroacetic acid redox catalyzed by trichloroacetate ions in acetonitrile solutions
Source: Royal Society of Chemistry journal article supplement (doi:10.1039/c2ob26961a), 2012-11-03
Supplement: c2ob26961a.pdf [file c2ob26961a.pdf]

## Supporting information

### Self-decarboxylation of trichloroacetic acid redox catalyzed by trichloroacetate ions in acetonitrile solutions

Drochss P. Valencia, Pablo D. Astudillo, Annia Galano and Felipe J. González

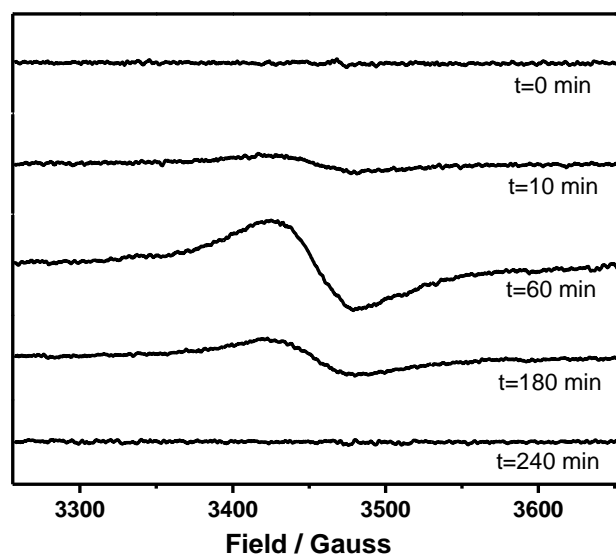

Fig. S1. Evolution with the time of the ESR spectra of a solution containing  $\text{Cl}_3\text{CCOOH}$  30 mM +  $\text{Cl}_3\text{CCOO}^-$  30 mM in acetonitrile. The spectra were registered in the X band (9.85 GHz), modulation amplitude 5 G, modulation frequency 100 kHz, time constant 5.120 ms, conversion time 10 ms, averaging over 20 scan,  $g=2.0023$ , at room temperature (about 25 °C)

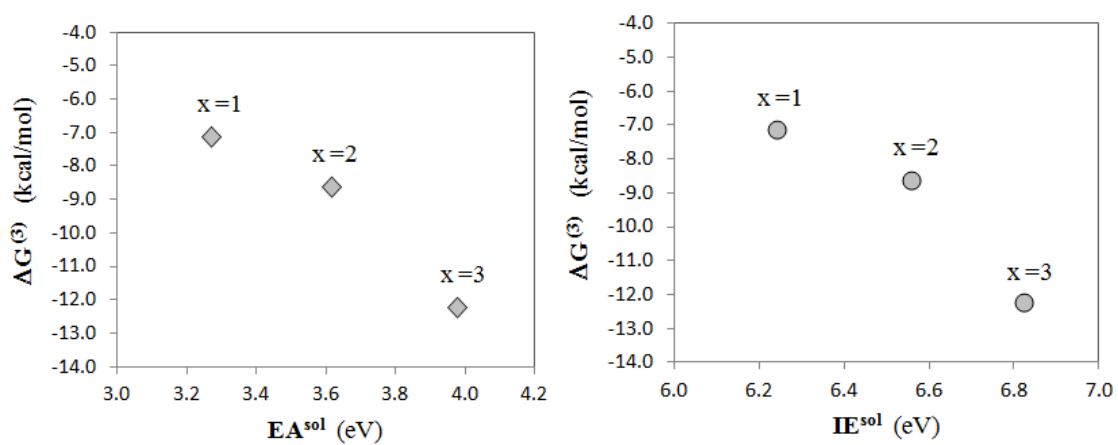

**Fig. S2.** Relationship of the  $\Delta G$  of the self-decarboxylation processes with the electron affinity of the acid, and with the ionization energy of the acetate.

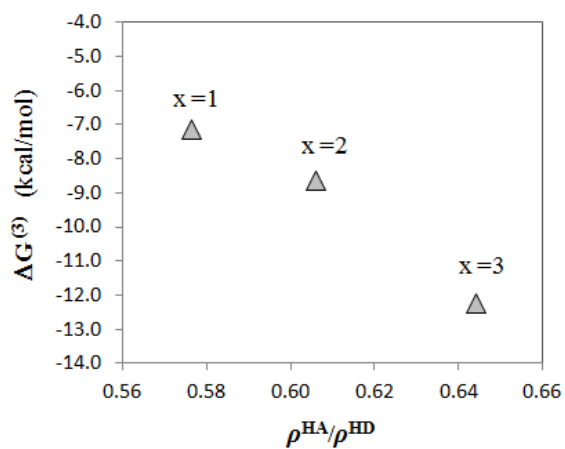

**Fig. S3.** Relationship of the  $\Delta G$  of the self-decarboxylation processes with the relative strength of the BCP points found in the complex.
